# Supplementary material
Source: PubMed Central journal article supplement (PMC4077906)
Supplement: NIHMS591208-supplement-Supplementary_Online_Material.pdf [file NIHMS591208-supplement-Supplementary_Online_Material.pdf]

# Supplementary Fig. 1

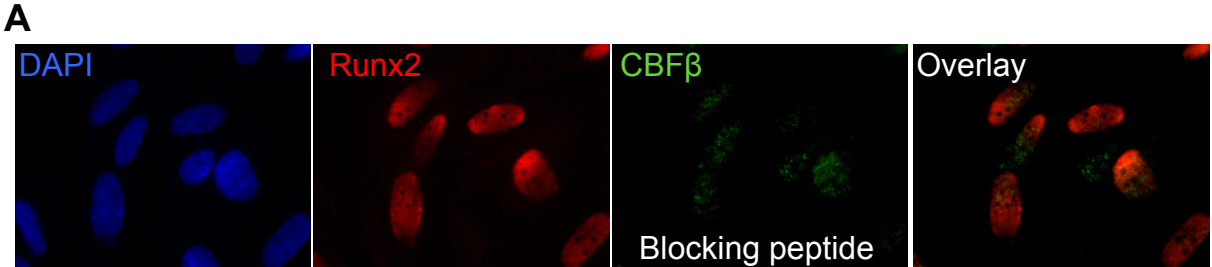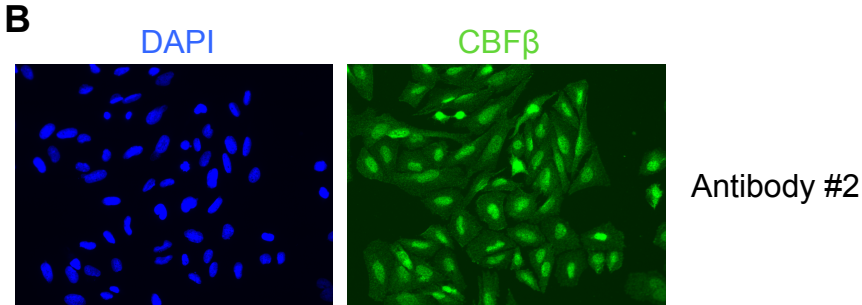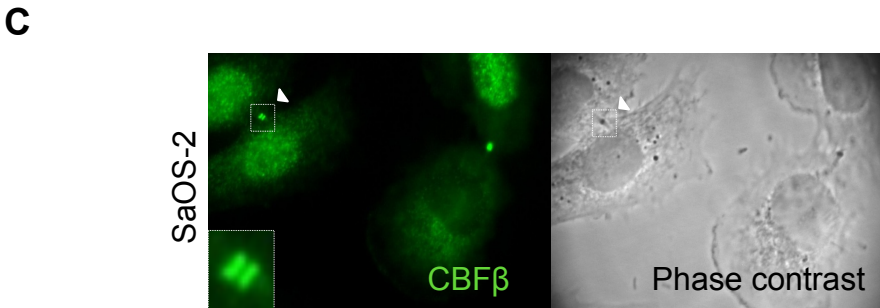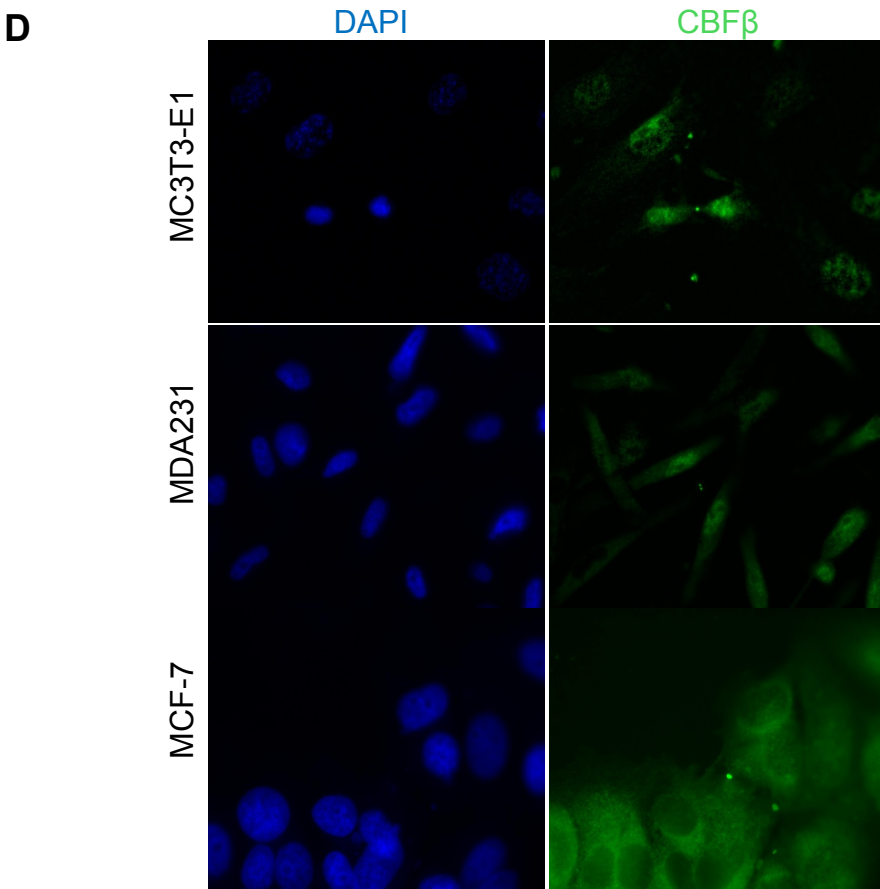

**Fig. S1. CBF $\beta$  antibody specificity and CBF $\beta$  association with the midbody in different cell lines.** (A) Analysis of CBF $\beta$  antibody specificity (ab33516) by peptide competition. Both RUNX2 and CBF $\beta$  antibodies were simultaneously incubated with human CBF $\beta$  peptide (ab41799, Abcam) in SaOS-2 cells. CBF $\beta$  antibody staining exhibits background levels when incubated with CBF $\beta$  peptide whereas RUNX2 labeling remained unchanged. (B) Staining for CBF $\beta$  in SaOS-2 cells labeled with CBF $\beta$  antibody A303-549A. Both ab33516 (see Fig 1A) and A303-549A CBF $\beta$  antibodies exhibited similar patterns of staining. (C) SaOS-2 cells were labeled for CBF $\beta$ . Midbody (see inset) is also evident under phase contrast microscopy. (D) Pre-osteoblastic mouse MC3T3-E1 and human breast cancer cell lines MDA-231 and MCF-7 also exhibit CBF $\beta$  localization in the midbody.

**A**

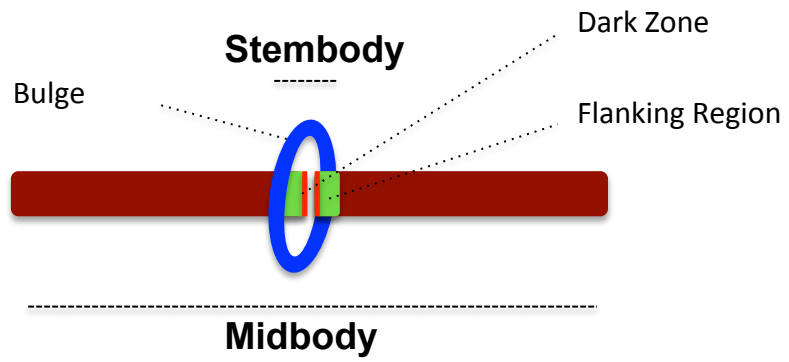

**B**

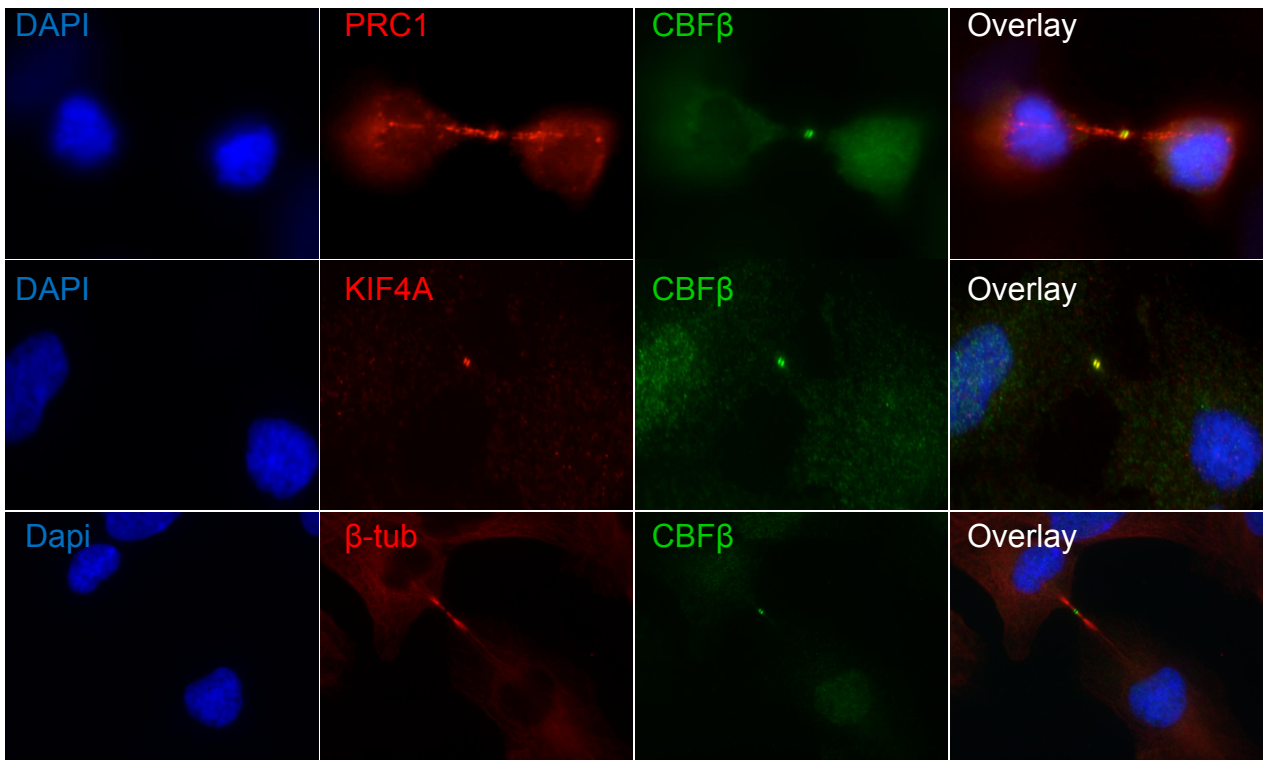

**Fig. S2. Midbody Representation and labeling with midbody markers.** (A) Diagrammatic representation of the midbody. The stembody comprised of the dark zone, flanking zone and bulge are represented by red, green and blue, respectively. Tubulin localization is represented by purple color. (B) Fixed cells were labeled for midbody markers by immunofluorescence. Full images corresponding to cropped insets from Fig 2C.

A

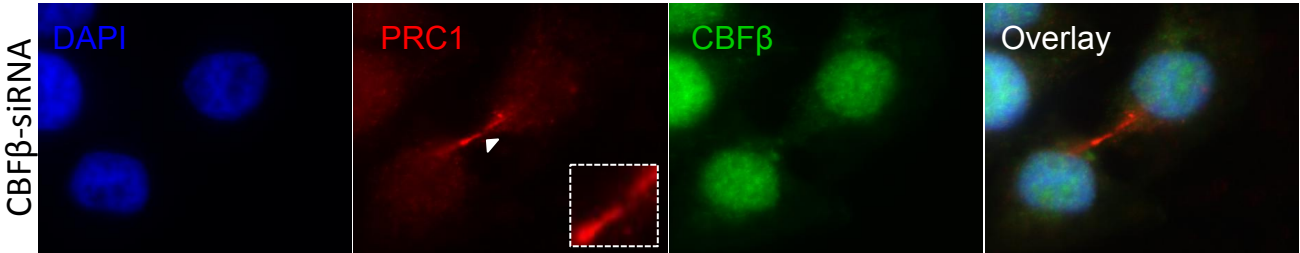

B

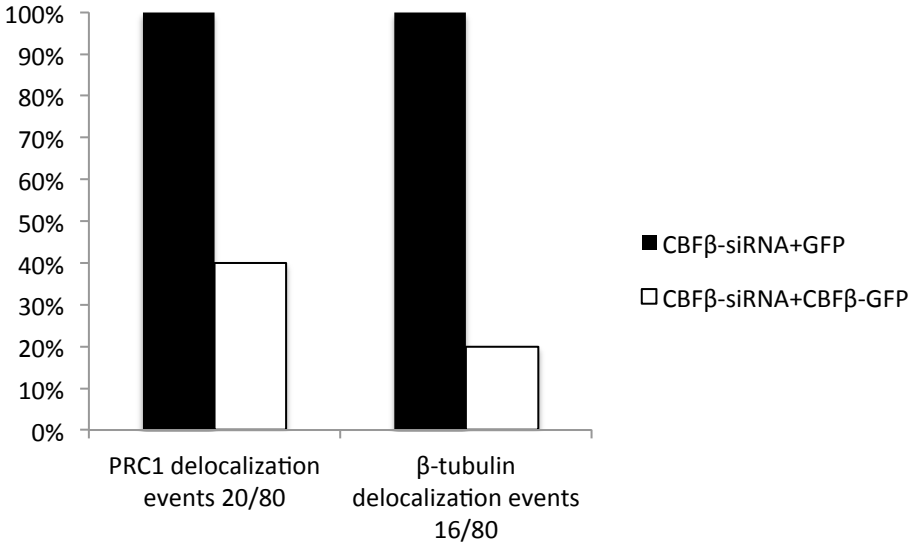

**Fig. S3. Depletion of CBF $\beta$  causes defects in the midbody structure.** (A) Cells transfected with CBF $\beta$ -siRNA lose CBF $\beta$  staining in the midbody and exhibit altered distribution of PRC1 (see normal PRC1 staining in Fig 2C). PRC1 staining is absent from parallel plate of the midbody. (B) Cells undergoing cytokinesis (n=80) were analyzed for delocalization of  $\beta$ -tubulin or PRC1 in CBF $\beta$ -siRNA cells transfected with a GFP plasmid or CBF $\beta$ -GFP plasmid. CBF $\beta$ -GFP expression rescued delocalization events induced by CBF $\beta$ -siRNA in comparison with CBF $\beta$ -siRNA treated cells expressing GFP only. Delocalization events are presented as percentile.

**A**

| Interactant |                              | Interactant |                  |
|-------------|------------------------------|-------------|------------------|
| GeneCard    | External ID(s)               | GeneCard    | External ID(s)   |
| RUNX1       | Q011962, 3, ENSP000003003054 | PDIA3       | P301013          |
| CHGB        | P050602, 3                   | PRKACB      | P226943          |
| Asun        | Q9NVM91, 3                   | RAB2A       | P610193          |
| MAP2        | P111371, 3                   | RARS        | P541363          |
| ASUN        | Q9NVM91, 3, ENSP000002611914 | RPL35       | P427663          |
| MYC         | P011063, ENSP000003672074    | SLC4A10     | Q6U8413          |
| MYOD1       | P151723, ENSP000002500034    | SPARCL1     | Q145153          |
| RUNX2       | Q139503, ENSP000003525144    | SYT1        | P215793          |
| RUNX3       | Q137613, ENSP000003434774    | FOS         | ENSP000003062454 |
| CBFA2T2     | O434393, ENSP000002626534    | SMAD4       | ENSP000003415514 |
| UTP3        | Q9NQZ23, ENSP000002548034    | IGHA1       | ENSP000003749894 |
| APP         | P050673                      | JUNB        | ENSP000003033154 |
| C1QBP       | Q070213                      | COPRS       | ENSP000003043274 |
| CEBPZ       | Q037013                      | TIE1        | ENSP000003615544 |
| COL7A1      | Q023883                      | ELAVL1      | ENSP000003852694 |
| DHX36       | Q9H2U13                      | BMI1        | ENSP000003658514 |
| DST         | Q030013                      | vif         | P125041          |
| GAS7        | O608613                      | --          | ENSP000003522624 |
| JUN         | P054123                      | --          | ENSP000002993514 |

**B**

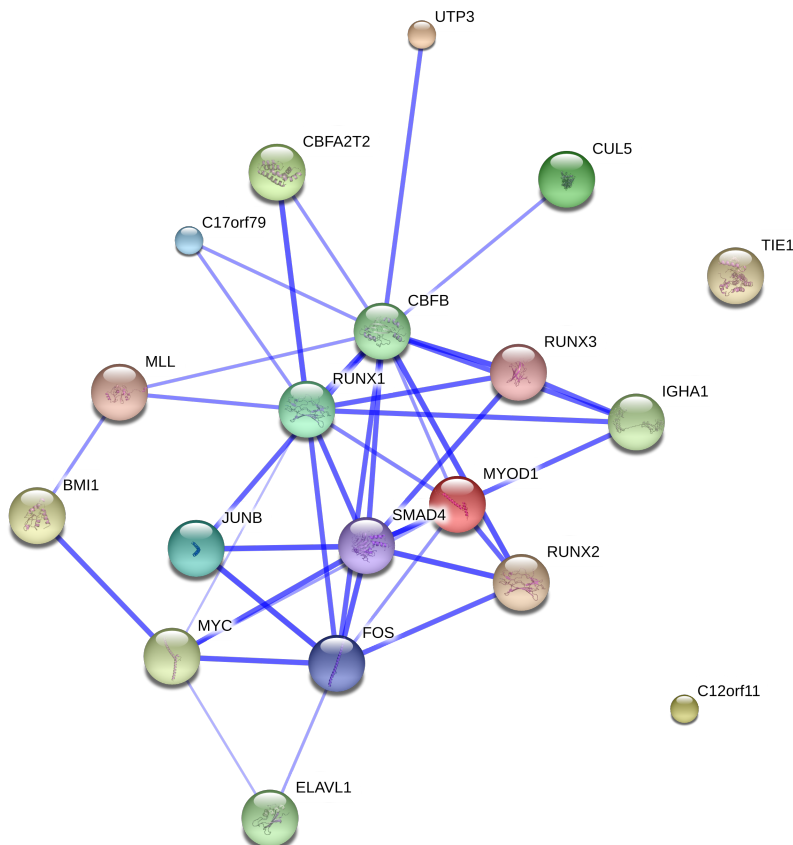

**Fig. S4. Reported CBF $\beta$  interaction partners.** (A) Interaction network for CBF $\beta$  using STRING (Search Tool for the Retrieval of Interacting Genes/Proteins). The network was based on “Confidence view”, in which stronger associations are represented by thicker lines. The network and functions of the interacting proteins can be retrieved at: [http://string-db.org/newstring.cgi/show\\_network\\_section.pl?taskId=xMXntWTKLrdH&interactive=yes&advanced\\_menu=no&network\\_flavor=confidence](http://string-db.org/newstring.cgi/show_network_section.pl?taskId=xMXntWTKLrdH&interactive=yes&advanced_menu=no&network_flavor=confidence).



**Table S1. CBF $\beta$  interaction partners**

| <b>Interactant</b> |                              | <b>Interactant</b> |                       |
|--------------------|------------------------------|--------------------|-----------------------|
| <b>GeneCard</b>    | <b>External ID(s)</b>        | <b>GeneCard</b>    | <b>External ID(s)</b> |
| RUNX1              | Q011962, 3, ENSP000003003054 | PDIA3              | P301013               |
| CHGB               | P050602, 3                   | PRKACB             | P226943               |
| Asun               | Q9NVM91, 3                   | RAB2A              | P610193               |
| MAP2               | P111371, 3                   | RARS               | P541363               |
| ASUN               | Q9NVM91, 3, ENSP000002611914 | RPL35              | P427663               |
| MYC                | P011063, ENSP000003672074    | SLC4A10            | Q6U8413               |
| MYOD1              | P151723, ENSP000002500034    | SPARCL1            | Q145153               |
| RUNX2              | Q139503, ENSP000003525144    | SYT1               | P215793               |
| RUNX3              | Q137613, ENSP000003434774    | FOS                | ENSP000003062454      |
| CBFA2T2            | O434393, ENSP000002626534    | SMAD4              | ENSP000003415514      |
| UTP3               | Q9NQZ23, ENSP000002548034    | IGHA1              | ENSP000003749894      |
| APP                | P050673                      | JUNB               | ENSP000003033154      |
| C1QBP              | Q070213                      | COPRS              | ENSP000003043274      |
| CEBPZ              | Q037013                      | TIE1               | ENSP000003615544      |
| COL7A1             | Q023883                      | ELAVL1             | ENSP000003852694      |
| DHX36              | Q9H2U13                      | BMI1               | ENSP000003658514      |
| DST                | Q030013                      | vif                | P125041               |
| GAS7               | O608613                      | --                 | ENSP000003522624      |
| JUN                | P054123                      | --                 | ENSP000002993514      |
